# Supplementary material for: Novel C,N-chelate rhodium(iii) and iridium(iii) antitumor complexes incorporating a lipophilic steroidal conjugate and their interaction with DNA
Source: Royal Society of Chemistry journal article supplement (doi:10.1039/c2dt31654d), 2012-01-01
Supplement: c2dt31654d.pdf [file c2dt31654d.pdf]

## Electronic Supplementary Information (ESI)

# Novel C,N-Chelate Rhodium(III) and Iridium(III) Antitumor Complexes Incorporating a Lipophilic Steroidal Conjugate and their interaction with DNA

José Ruiz,<sup>a,\*</sup> Venancio Rodríguez,<sup>a</sup> Natalia Cutillas,<sup>a</sup> Katia G. Samper,<sup>b</sup> M. Capdevila<sup>b</sup>

Oscar Palacios<sup>b</sup> and Arturo Espinosa.<sup>c</sup>

<sup>a</sup>Departamento de Química Inorgánica, Universidad de Murcia, 30071- Murcia, Spain. E-mail: [jruiz@um.es](mailto:jruiz@um.es);  
Fax: +34 868 884148; Tel: +34 868 887455.

<sup>b</sup>Departament de Química, Facultat de Ciències, Universitat Autònoma de Barcelona, 08193-Cerdanyola del  
Vallès, Barcelona, Spain. E-mail: [Oscar.Palacios@uab.cat](mailto:Oscar.Palacios@uab.cat); Fax: +34 935813101; Tel: +34 935814532

<sup>c</sup>Departamento de Química Orgánica, Universidad de Murcia, 30071- Murcia, Spain. E-mail: [artuesp@um.es](mailto:artuesp@um.es);  
Fax: +34 868 884149; Tel: +34 868 887489.

**Calculated structures:** cartesian coordinates (in Å) and energies for all computed species.-

Complex 1':

E = -1439.394618427 au

|    |            |            |            |   |            |            |             |
|----|------------|------------|------------|---|------------|------------|-------------|
| Rh | 0.00000000 | 0.00000000 | 0.00000000 | C | 0.12748441 | 2.83765659 | 1.10603869  |
| Cl | 2.39405049 | 0.00000000 | 0.00000000 | C | 0.14487642 | 4.22060436 | 1.07435209  |
| N  | 0.02670713 | 2.09486443 | 0.00000000 | C | 0.07017150 | 4.85303775 | -0.16570613 |

|   |             |             |             |   |             |             |             |
|---|-------------|-------------|-------------|---|-------------|-------------|-------------|
| C | -0.00171996 | 4.08483335  | -1.31343136 | C | 0.45069059  | -3.22483773 | -0.12213511 |
| C | -0.01760052 | 2.68965259  | -1.21812640 | H | 0.21848338  | -4.17138007 | 0.37907675  |
| C | -0.03342790 | 1.75541327  | -2.33334049 | H | 1.51382239  | -3.01613904 | 0.00875333  |
| C | 0.03331353  | 0.39175086  | -1.97693798 | H | 0.25892028  | -3.35055230 | -1.18839648 |
| C | 0.14417716  | -0.54705930 | -3.00053385 | C | 0.99510553  | -1.84222395 | 2.64191153  |
| C | 0.13800270  | -0.15557597 | -4.33543312 | H | 0.89761524  | -2.87451637 | 2.99516598  |
| C | 0.03349862  | 1.19396156  | -4.67865304 | H | 1.03018414  | -1.18397697 | 3.51072515  |
| C | -0.04238383 | 2.14859671  | -3.67733490 | H | 1.94087392  | -1.74922355 | 2.10239406  |
| H | 0.20244025  | 2.29064145  | 2.03455799  | C | -1.29256517 | 0.36567658  | 3.13053205  |
| H | 0.22317662  | 4.78102606  | 1.99558889  | H | -2.01322161 | -0.06176599 | 3.83659742  |
| H | 0.08243009  | 5.93388159  | -0.23388682 | H | -1.67333433 | 1.34649339  | 2.83778901  |
| H | -0.03417086 | 4.54995905  | -2.28781143 | H | -0.34839935 | 0.50543433  | 3.65897407  |
| H | 0.25650710  | -1.59570803 | -2.75615215 | C | -3.20033863 | 0.35012795  | 0.60300911  |
| H | 0.22660264  | -0.90349573 | -5.11514998 | H | -4.06440930 | -0.10425302 | 1.10111652  |
| H | 0.03160975  | 1.49534490  | -5.71854283 | H | -3.44520588 | 0.47473326  | -0.45281606 |
| H | -0.09455342 | 3.19821384  | -3.94000975 | H | -3.04970171 | 1.34007535  | 1.03687285  |
| C | -0.36163133 | -2.10457055 | 0.43664328  | C | -2.26761208 | -1.98595755 | -1.34144666 |
| C | -0.13907207 | -1.49240459 | 1.74182440  | H | -3.08639864 | -2.66417095 | -1.07734271 |
| C | -1.12275039 | -0.51920685 | 1.94148894  | H | -1.59734927 | -2.51303102 | -2.01821889 |
| C | -1.98007679 | -0.49576853 | 0.76558272  | H | -2.68699647 | -1.13531623 | -1.87943678 |
| C | -1.55729335 | -1.54646731 | -0.10638207 |   |             |             |             |

Complex 1:

E = -2405.599578147 au (RIJCOSX-B3LYPD/def2-TZVPecp)

E = -2405.422352956 au

|    |             |             |             |   |             |             |             |
|----|-------------|-------------|-------------|---|-------------|-------------|-------------|
| Rh | 0.00000000  | 0.00000000  | 0.00000000  | H | 1.03679062  | -1.30471263 | -3.50123061 |
| Cl | 2.39243161  | 0.00000000  | 0.00000000  | C | 0.38966074  | -3.23037612 | 0.18355424  |
| N  | 0.03157087  | 2.09433330  | 0.00000000  | H | 0.13086705  | -4.18282386 | -0.29284041 |
| C  | 0.15455444  | 2.84244287  | -1.10076415 | H | 0.18895990  | -3.32259619 | 1.25178478  |
| C  | 0.18291023  | 4.22102338  | -1.06879203 | H | 1.45894623  | -3.05632595 | 0.05276374  |
| C  | 0.10016079  | 4.86809433  | 0.17522625  | C | -2.32033035 | -1.92106497 | 1.33443053  |
| C  | 0.00133967  | 4.07981846  | 1.32026386  | H | -3.11117868 | -2.63414315 | 1.07621258  |
| C  | -0.02671289 | 2.68959010  | 1.21767195  | H | -2.77909096 | -1.06168293 | 1.82314810  |
| C  | -0.06585068 | 1.75558294  | 2.33254263  | H | -1.65697456 | -2.40044906 | 2.05193148  |
| C  | 0.01813786  | 0.39216414  | 1.97758274  | C | 0.13302051  | 6.28721318  | 0.26347578  |
| C  | 0.11548615  | -0.54512709 | 3.00454452  | C | 0.15328235  | 7.49055117  | 0.32690598  |
| C  | 0.06898987  | -0.15331857 | 4.33865857  | C | 0.22825323  | 8.95280164  | 0.42012599  |
| C  | -0.06311564 | 1.19450096  | 4.67866423  | C | -1.17355918 | 9.62310801  | 0.24020767  |
| C  | -0.11678403 | 2.14861440  | 3.67571397  | C | -2.08723570 | 9.02529344  | -0.82744216 |
| H  | 0.23843080  | 2.29978814  | -2.03153543 | C | -3.50328646 | 9.60078667  | -0.69504196 |
| H  | 0.28006572  | 4.78929530  | -1.98257339 | C | -4.10739986 | 9.35861414  | 0.69610656  |
| H  | -0.03743923 | 4.54701669  | 2.29293196  | C | -5.53326604 | 9.94670623  | 0.81734274  |
| H  | 0.24706565  | -1.59202108 | 2.76292517  | C | -6.46487669 | 9.36459388  | -0.25479169 |
| H  | 0.14395755  | -0.90035196 | 5.12075094  | C | -7.93837486 | 9.66435920  | 0.01361401  |
| H  | -0.10221996 | 1.49399737  | 5.71823198  | C | -8.35598170 | 9.18768124  | 1.39111742  |
| H  | -0.18832485 | 3.19731502  | 3.93859731  | C | -7.34481265 | 9.34651480  | 2.44642726  |
| C  | -1.97327829 | -0.47420086 | -0.79436716 | C | -6.08637963 | 9.75297976  | 2.21454410  |
| C  | -1.09582239 | -0.53349805 | -1.95574166 | C | -5.16255141 | 10.08117844 | 3.35345187  |
| C  | -0.13535698 | -1.52090857 | -1.72079612 | C | -3.76647624 | 9.47916966  | 3.17922359  |
| C  | -0.38787192 | -2.10217036 | -0.40774942 | C | -3.18565365 | 9.86552806  | 1.82245730  |
| C  | -1.58520899 | -1.51504876 | 0.10349127  | C | -1.78599751 | 9.30598102  | 1.62312890  |
| C  | -3.17746624 | 0.39972128  | -0.66634340 | C | -0.68872796 | 9.69417627  | 2.62135765  |
| H  | -4.03043488 | -0.02358986 | -1.20916740 | C | 0.63179999  | 9.37478086  | 1.87451970  |
| H  | -2.98217455 | 1.39280737  | -1.07519028 | O | 1.14632753  | 9.43650109  | -0.56425487 |
| H  | -3.46399614 | 0.51283853  | 0.37984364  | H | 1.97226969  | 8.94763984  | -0.47343191 |
| C  | -1.22670793 | 0.33302872  | -3.16419186 | C | -0.98660804 | 11.15238482 | 0.03300925  |
| H  | -1.94478453 | -0.09144229 | -3.87456212 | H | -1.86185657 | 11.66513599 | 0.43247381  |
| H  | -0.27081036 | 0.44206499  | -3.67918438 | C | -0.13918384 | 11.49371513 | 0.62917638  |
| H  | -1.58851975 | 1.32679125  | -2.89411934 | H | -0.78775835 | 11.61575612 | -1.41280021 |
| C  | 1.00484366  | -1.91118495 | -2.59549195 | H | -0.59414150 | 12.69135413 | -1.42957973 |
| H  | 0.91682674  | -2.96269380 | -2.88708677 | H | 0.05237686  | 11.10621514 | -1.88121405 |
| H  | 1.94844114  | -1.78088763 | -2.05966936 | H | -1.68135433 | 11.43264771 | -2.01389457 |

|   |             |             |             |   |             |             |            |
|---|-------------|-------------|-------------|---|-------------|-------------|------------|
| H | -2.13190149 | 7.94191450  | -0.68692512 | H | -7.69019936 | 9.17695625  | 3.46106596 |
| H | -1.69500891 | 9.20634629  | -1.82897112 | H | -5.05419939 | 11.17438877 | 3.38552949 |
| H | -3.49136525 | 10.67789342 | -0.89370041 | H | -5.61400781 | 9.77639876  | 4.29976542 |
| H | -4.13830922 | 9.14672593  | -1.45656069 | H | -3.81922063 | 8.38626764  | 3.24641475 |
| H | -4.19647946 | 8.27115798  | 0.83143751  | H | -3.11446321 | 9.82340139  | 3.98536272 |
| H | -5.44352032 | 11.03257548 | 0.65720741  | H | -3.15503109 | 10.96085583 | 1.77852326 |
| H | -6.31961884 | 8.27858453  | -0.27899687 | H | -1.89068225 | 8.21375221  | 1.66364832 |
| H | -6.18377194 | 9.74611769  | -1.23645406 | H | -0.75002916 | 10.76036006 | 2.85118714 |
| H | -8.10680951 | 10.74842444 | -0.01562288 | H | -0.77599383 | 9.14957387  | 3.56178940 |
| H | -8.59270034 | 9.20849667  | -0.73050674 | H | 1.20859689  | 8.58893015  | 2.36173474 |
| O | -9.47073522 | 8.75834912  | 1.62225598  | H | 1.26802214  | 10.25620202 | 1.79175479 |

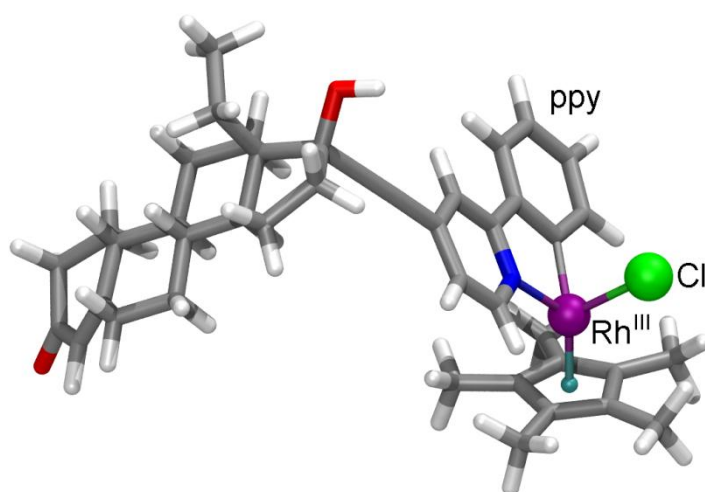

Complex **1** *diaster.*:

$E = -2405.599680774$  au (RIJCOSX-B3LYPD/def2-TZVPecp)

$E = -2405.422285677$  au

|    |             |             |             |   |             |             |             |
|----|-------------|-------------|-------------|---|-------------|-------------|-------------|
| Rh | 0.00000000  | 0.00000000  | 0.00000000  | H | -3.33272281 | -1.19378059 | 0.28299380  |
| Cl | 0.00000000  | 0.00000000  | 2.39301918  | C | -1.84327918 | 2.64153863  | 0.99968814  |
| N  | 2.09228404  | 0.00000000  | 0.02243447  | H | -2.88198215 | 2.97696709  | 0.91396655  |
| C  | 2.83883322  | 1.10409800  | 0.12288216  | H | -1.19795328 | 3.51989669  | 1.02277509  |
| C  | 4.21757065  | 1.07583371  | 0.13298622  | H | -1.73045386 | 2.10696059  | 1.94641981  |
| C  | 4.86681466  | -0.16699139 | 0.05063316  | C | 0.35928848  | 3.13475111  | -1.29579862 |
| C  | 4.08051492  | -1.31568665 | -0.01838121 | H | -0.06930750 | 3.83663265  | -2.01947208 |
| C  | 2.68949612  | -1.21724247 | -0.02658241 | H | 1.34059622  | 2.84062358  | -1.67376052 |
| C  | 1.75709526  | -2.33360968 | -0.04849275 | H | 0.49657595  | 3.66822918  | -0.35393070 |
| C  | 0.39269509  | -1.97891625 | 0.02361514  | C | 0.33547143  | 0.60423617  | -3.20382257 |
| C  | -0.54458077 | -3.00563670 | 0.12222026  | H | -0.12046512 | 1.10850635  | -4.06365668 |
| C  | -0.15079072 | -4.33981614 | 0.09553695  | H | 0.45239031  | -0.45100634 | -3.45395978 |
| C  | 1.19899252  | -4.68014294 | -0.01666047 | H | 1.32873181  | 1.03181155  | -3.05577090 |
| C  | 2.15238758  | -3.67694834 | -0.07717432 | C | -1.98998301 | -1.33897749 | -2.26609019 |
| H  | 2.29488684  | 2.03430402  | 0.20215090  | H | -2.66497893 | -1.07152459 | -3.08643916 |
| H  | 4.78389253  | 1.99269609  | 0.21054259  | H | -2.52261858 | -2.01482716 | -1.59928770 |
| H  | 4.55111252  | -2.28657111 | -0.05903392 | H | -1.13951721 | -1.87815076 | -2.68394145 |
| H  | -1.59333771 | -2.76414970 | 0.23822094  | C | 6.28659853  | -0.25144629 | 0.03669830  |
| H  | -0.89775763 | -5.12169922 | 0.17268712  | C | 7.48823442  | -0.33056168 | -0.00826958 |
| H  | 1.50023709  | -5.71967453 | -0.03725719 | C | 8.95118611  | -0.42389532 | -0.06104861 |
| H  | 3.20200533  | -3.93895717 | -0.13545300 | C | 9.45595875  | -0.71262826 | -1.51450561 |
| C  | -2.10349876 | 0.43605802  | -0.35411541 | C | 8.63790956  | -1.70565165 | -2.33882717 |
| C  | -1.49429957 | 1.74319030  | -0.13538484 | C | 9.07344871  | -1.66161063 | -3.80935995 |
| C  | -0.52447488 | 1.94427339  | -1.12187579 | C | 8.93698722  | -0.25690615 | -4.41380728 |
| C  | -0.50254966 | 0.76760393  | -1.97904131 | C | 9.33752244  | -0.22576758 | -5.90831438 |
| C  | -1.55044565 | -0.10548395 | -1.55295962 | C | 8.48422116  | -1.20949121 | -6.72319451 |
| C  | -3.21634317 | -0.12469122 | 0.46623009  | C | 8.56897385  | -0.97011649 | -8.22956794 |
| H  | -4.16829090 | 0.36541366  | 0.23251157  | C | 8.20907101  | 0.46086751  | -8.57942751 |
| H  | -3.00368354 | 0.01628609  | 1.52722481  | C | 8.69118597  | 1.47796233  | -7.63434064 |

|   |             |             |             |   |             |             |             |
|---|-------------|-------------|-------------|---|-------------|-------------|-------------|
| C | 9.26414192  | 1.18391641  | -6.45653225 | H | 8.46645747  | -2.36903740 | -4.37561056 |
| C | 9.89542931  | 2.25739804  | -5.61713304 | H | 7.87456660  | 0.02067292  | -4.36570263 |
| C | 9.45628934  | 2.18908098  | -4.15210004 | H | 10.39224706 | -0.53628754 | -5.96421020 |
| C | 9.70137144  | 0.79418142  | -3.58539770 | H | 7.44143603  | -1.09987633 | -6.40480380 |
| C | 9.26805579  | 0.69205180  | -2.13098770 | H | 8.78129888  | -2.23326809 | -6.49470439 |
| C | 9.89226549  | 1.64274528  | -1.10300146 | H | 9.59716352  | -1.13707697 | -8.57414746 |
| C | 9.59441274  | 0.96825133  | 0.26122126  | H | 7.91875470  | -1.64418694 | -8.78869010 |
| O | 9.38877554  | -1.44808589 | 0.83628198  | O | 7.61420588  | 0.75449054  | -9.59928900 |
| H | 8.99124520  | -1.28491105 | 1.69925865  | H | 8.61490331  | 2.50791122  | -7.96750303 |
| C | 10.95494867 | -1.11975416 | -1.46440045 | H | 10.98347641 | 2.10827765  | -5.64942517 |
| H | 11.43054364 | -0.80350573 | -2.39334186 | H | 9.69097001  | 3.23889601  | -6.04959023 |
| H | 11.45021494 | -0.56371373 | -0.66731386 | H | 8.38873969  | 2.42408217  | -4.07250918 |
| C | 11.23910715 | -2.61196110 | -1.27197128 | H | 9.99874960  | 2.93701851  | -3.56891564 |
| H | 12.31522137 | -2.76973907 | -1.16420179 | H | 10.77479075 | 0.58815765  | -3.67005252 |
| H | 10.74318442 | -2.99884787 | -0.38334812 | H | 8.18660841  | 0.88048022  | -2.13055675 |
| H | 10.90499558 | -3.19258639 | -2.13476923 | H | 10.97013035 | 1.71836844  | -1.26549772 |
| H | 7.58205849  | -1.43022273 | -2.27846990 | H | 9.47861336  | 2.64927356  | -1.16826805 |
| H | 8.73158586  | -2.71743081 | -1.94259259 | H | 8.93269705  | 1.56676716  | 0.88720206  |
| H | 10.11456002 | -1.98846051 | -3.90445819 | H | 10.50971779 | 0.78093711  | 0.82305160  |

Complex 2':

E = -1433.190723725 au

|    |             |             |             |   |             |             |             |
|----|-------------|-------------|-------------|---|-------------|-------------|-------------|
| Ir | 0.00000000  | 0.00000000  | 0.00000000  | C | -1.03899802 | -0.52509467 | 2.00659164  |
| Cl | 2.40916425  | 0.00000000  | 0.00000000  | C | -1.95665400 | -0.42181701 | 0.87639671  |
| N  | 0.13297734  | 2.09223903  | 0.00000000  | C | -1.61799592 | -1.45748103 | -0.05893998 |
| C  | 0.26993222  | 2.81984552  | 1.11581848  | C | 0.26783026  | -3.27778179 | -0.19616057 |
| C  | 0.37968299  | 4.19693148  | 1.09545981  | H | -0.07721067 | -4.21440257 | 0.25714710  |
| C  | 0.36678734  | 4.84495264  | -0.13932012 | H | 1.34751064  | -3.20415095 | -0.05328819 |
| C  | 0.25472445  | 4.09311050  | -1.29301916 | H | 0.07193264  | -3.33232699 | -1.26838259 |
| C  | 0.14057922  | 2.70083080  | -1.21353404 | C | 1.03791728  | -1.97779580 | 2.56301988  |
| C  | 0.05697264  | 1.78467947  | -2.33593705 | H | 0.90020934  | -3.01868855 | 2.87341097  |
| C  | 0.03405170  | 0.41529168  | -1.98600828 | H | 1.13420929  | -1.36137047 | 3.45643065  |
| C  | 0.05373147  | -0.51455311 | -3.02948869 | H | 1.97023941  | -1.90875369 | 1.99671616  |
| C  | 0.04212745  | -0.10617302 | -4.35887117 | C | -1.12107214 | 0.30529690  | 3.24678702  |
| C  | 0.02517706  | 1.25206029  | -4.68781611 | H | -1.81984386 | -0.13751137 | 3.96531513  |
| C  | 0.04380750  | 2.19584360  | -3.67520350 | H | -1.48268383 | 1.31116092  | 3.02259569  |
| H  | 0.29726245  | 2.26471716  | 2.04250186  | H | -0.14811592 | 0.38974155  | 3.73447127  |
| H  | 0.48555311  | 4.74202034  | 2.02320994  | C | -3.16949238 | 0.45142074  | 0.82711384  |
| H  | 0.45740674  | 5.92269958  | -0.19659134 | H | -3.99451090 | 0.00319342  | 1.39294960  |
| H  | 0.26604697  | 4.56738442  | -2.26351555 | H | -3.50232859 | 0.59604738  | -0.20127734 |
| H  | 0.09741523  | -1.57318667 | -2.80543701 | H | -2.96578348 | 1.43289336  | 1.25897470  |
| H  | 0.05666402  | -0.84908981 | -5.14840996 | C | -2.42043210 | -1.84580896 | -1.25530815 |
| H  | 0.01529752  | 1.56398472  | -5.72444495 | H | -3.18460853 | -2.57554825 | -0.96527320 |
| H  | 0.05571868  | 3.24976594  | -3.92618901 | H | -1.79556522 | -2.30048489 | -2.02300512 |
| C  | -0.42047116 | -2.09876641 | 0.41090792  | H | -2.91980613 | -0.98256394 | -1.69610064 |
| C  | -0.11217565 | -1.53843655 | 1.72194314  |   |             |             |             |

Complex 2:

E = -2399.395364365 au

|    |            |             |            |   |             |             |            |
|----|------------|-------------|------------|---|-------------|-------------|------------|
| Ir | 0.00000000 | 0.00000000  | 0.00000000 | C | 1.78369552  | 2.33714952  | 0.03824102 |
| Cl | 0.00000000 | 0.00000000  | 2.40789323 | C | 0.41489203  | 1.98559669  | 0.03705270 |
| N  | 2.09026686 | 0.00000000  | 0.10959665 | C | -0.51566013 | 3.02825649  | 0.07653984 |
| C  | 2.82719337 | -1.11260485 | 0.23020441 | C | -0.10915155 | 4.35762001  | 0.06432217 |
| C  | 4.20281946 | -1.09326188 | 0.30476412 | C | 1.24830220  | 4.68852812  | 0.02606625 |
| C  | 4.86599118 | 0.14601640  | 0.27620663 | C | 2.19341479  | 3.67702701  | 0.02435132 |
| C  | 4.09091565 | 1.29924114  | 0.18219906 | H | 2.27832516  | -2.04239649 | 0.27045804 |
| C  | 2.70068056 | 1.21408432  | 0.10239809 | H | 4.75804965  | -2.01577231 | 0.39459091 |

|   |             |             |             |   |             |             |             |
|---|-------------|-------------|-------------|---|-------------|-------------|-------------|
| H | 4.56705147  | 2.26827545  | 0.18078171  | C | 9.25630254  | 2.08805003  | -7.95368130 |
| H | -1.57308918 | 2.80298989  | 0.13594874  | C | 9.44004324  | 3.03892276  | -6.84807889 |
| H | -0.85271133 | 5.14612552  | 0.09302301  | C | 9.83355995  | 2.67885371  | -5.61581579 |
| H | 1.55822833  | 5.72566061  | 0.01539182  | C | 10.18743305 | 3.71815628  | -4.58990431 |
| H | 3.24697315  | 3.92982909  | 0.02021989  | C | 9.56535198  | 3.43366893  | -3.22123254 |
| C | -0.42976639 | -0.87958564 | -1.95319863 | C | 9.91724780  | 2.02181946  | -2.76274131 |
| C | -0.54248024 | -2.00583494 | -1.03211037 | C | 9.33995702  | 1.70816220  | -1.39127893 |
| C | -1.55403002 | -1.70899629 | -0.10677076 | C | 9.72708520  | 2.60108803  | -0.20663726 |
| C | -2.10308739 | -0.39391993 | -0.41946957 | C | 9.38203630  | 1.74610918  | 1.03894534  |
| C | -1.45781722 | 0.06595210  | -1.61797577 | O | 9.41317928  | -0.72755719 | 1.34047571  |
| C | 0.44673017  | -0.84450549 | -3.16450516 | H | 8.92961518  | -0.68929203 | 2.17350035  |
| H | 0.00515215  | -1.42845181 | -3.98063051 | C | 11.15844686 | 0.03072155  | -0.71424238 |
| H | 1.43114310  | -1.26563847 | -2.94969882 | H | 11.68715976 | 0.50062196  | -1.54396595 |
| H | 0.58468302  | 0.17849660  | -3.51651018 | H | 11.49485211 | 0.54382744  | 0.18753929  |
| C | 0.27583137  | -3.25356997 | -1.11037143 | C | 11.60297432 | -1.43227851 | -0.64143527 |
| H | -0.17380031 | -3.96986862 | -1.80717795 | H | 12.67434525 | -1.47994581 | -0.43001879 |
| H | 0.35548858  | -3.74007600 | -0.13665585 | H | 11.07220176 | -1.96999294 | 0.14225841  |
| H | 1.28300009  | -3.03988755 | -1.47350254 | H | 11.43080864 | -1.94619478 | -1.58985382 |
| C | -2.00269882 | -2.54478391 | 1.04407426  | H | 7.95300635  | -0.55024842 | -1.94941293 |
| H | -3.04767338 | -2.84118480 | 0.90673335  | H | 9.20502968  | -1.73807246 | -1.60886166 |
| H | -1.92470381 | -1.98008946 | 1.97609183  | H | 10.69596324 | -0.65835566 | -3.30453039 |
| H | -1.39902929 | -3.44814013 | 1.13959802  | H | 9.16419618  | -1.14793870 | -4.00888800 |
| C | -3.27785463 | 0.22780686  | 0.26381187  | H | 8.31111451  | 1.14993699  | -3.86065441 |
| H | -4.21655858 | -0.23314139 | -0.06433534 | H | 11.06793150 | 1.03325906  | -5.12304673 |
| H | -3.33392076 | 1.29539737  | 0.04462482  | H | 8.28829172  | 0.26446548  | -6.07866726 |
| H | -3.19705817 | 0.10885174  | 1.34576014  | H | 9.72537612  | -0.74684513 | -6.03364812 |
| C | -1.83438448 | 1.26605606  | -2.41987434 | H | 10.77027024 | 0.61578543  | -7.83435842 |
| H | -2.58295056 | 0.98704854  | -3.17004620 | H | 9.21050887  | -0.00265144 | -8.38466697 |
| H | -0.97079530 | 1.68475776  | -2.93644673 | O | 8.84450913  | 2.43675402  | -9.04432752 |
| H | -2.26162276 | 2.04659392  | -1.79216521 | H | 9.30275667  | 4.08577554  | -7.09768576 |
| C | 6.28423452  | 0.21780962  | 0.35186629  | H | 11.27950713 | 3.70605030  | -4.46965010 |
| C | 7.48741534  | 0.26681193  | 0.40471651  | H | 9.91498118  | 4.71049176  | -4.95459035 |
| C | 8.94916602  | 0.33728677  | 0.50559636  | H | 8.47514598  | 3.52988748  | -3.27900090 |
| C | 9.63409860  | 0.27252454  | -0.89935018 | H | 9.91955411  | 4.16900841  | -2.49485098 |
| C | 9.03461551  | -0.70365737 | -1.91015979 | H | 11.01072167 | 1.95179282  | -2.72792302 |
| C | 9.62052552  | -0.45030708 | -3.30553204 | H | 8.24986031  | 1.77157025  | -1.50444530 |
| C | 9.39605843  | 0.99201063  | -3.78433123 | H | 10.79693057 | 2.82089402  | -0.23508038 |
| C | 9.98712424  | 1.23113095  | -5.19455558 | H | 9.19569762  | 3.55284527  | -0.21768591 |
| C | 9.37493090  | 0.26810460  | -6.22162878 | H | 8.59407802  | 2.19130396  | 1.64609634  |
| C | 9.68691622  | 0.66317537  | -7.66415060 | H | 10.25421012 | 1.59794792  | 1.67607743  |

Complex 3':

E = -1423.224134519 au

|    |            |             |             |   |             |             |             |
|----|------------|-------------|-------------|---|-------------|-------------|-------------|
| Ru | 0.00000000 | 0.00000000  | 0.00000000  | H | -0.02159808 | 1.60066398  | -5.72521831 |
| Cl | 2.40740270 | 0.00000000  | 0.00000000  | H | 0.04822297  | 3.27203552  | -3.91404245 |
| N  | 0.13640320 | 2.08687241  | 0.00000000  | C | -2.04417316 | -0.76913000 | -0.09788672 |
| C  | 0.25919982 | 2.81043607  | 1.12030619  | C | -1.87667822 | -0.01091932 | 1.08653893  |
| C  | 0.35851219 | 4.18859978  | 1.11089448  | C | -0.93310658 | -0.38302142 | 2.10130103  |
| C  | 0.34731092 | 4.84425731  | -0.11917876 | C | -0.02855874 | -1.41367570 | 1.87640789  |
| C  | 0.24788567 | 4.09906166  | -1.27867759 | C | -0.11127689 | -2.12087632 | 0.62402572  |
| C  | 0.14621498 | 2.70627660  | -1.20783345 | C | -1.13105509 | -1.85092297 | -0.30036726 |
| C  | 0.06701457 | 1.79545423  | -2.33599432 | H | -2.48464022 | 0.86927702  | 1.23844539  |
| C  | 0.04958601 | 0.42395447  | -1.99298291 | H | -0.85419253 | 0.21160009  | 3.00151641  |
| C  | 0.04265174 | -0.49586544 | -3.04601674 | H | 0.64689725  | -2.85338051 | 0.38761918  |
| C  | 0.01294908 | -0.07889453 | -4.37303759 | H | -1.16456826 | -2.39499111 | -1.23361383 |
| C  | 0.00117423 | 1.28054960  | -4.69135284 | C | -3.08385459 | -0.45824955 | -1.14497416 |
| C  | 0.03810824 | 2.21627918  | -3.67084499 | H | -2.64227265 | -0.73708963 | -2.10579146 |
| H  | 0.28409178 | 2.24376660  | 2.04010844  | C | -3.43952658 | 1.02617311  | -1.21404969 |
| H  | 0.45178901 | 4.72887175  | 2.04264855  | H | -4.10559700 | 1.20647760  | -2.06035942 |
| H  | 0.42748424 | 5.92297140  | -0.16867179 | H | -3.95893025 | 1.35105923  | -0.30824076 |
| H  | 0.25833064 | 4.57986448  | -2.24598446 | H | -2.54076924 | 1.63094725  | -1.34165386 |
| H  | 0.08121075 | -1.55645902 | -2.83174168 | C | -4.33378454 | -1.31832357 | -0.91666721 |
| H  | 0.00651647 | -0.81689320 | -5.16731218 | H | -5.06410255 | -1.14772920 | -1.71203480 |

|   |             |             |             |   |            |             |            |
|---|-------------|-------------|-------------|---|------------|-------------|------------|
| H | -4.08422918 | -2.38213880 | -0.89947594 | H | 1.06568878 | -2.75911594 | 3.13319135 |
| H | -4.80105843 | -1.06247011 | 0.03885981  | H | 2.04442085 | -1.53190333 | 2.30345764 |
| C | 1.09468458  | -1.71244265 | 2.81628749  | H | 1.04721861 | -1.07461377 | 3.70001729 |

Complex 3':

E = -2389.359347968 au

|    |             |             |             |   |             |             |              |
|----|-------------|-------------|-------------|---|-------------|-------------|--------------|
| Ru | 0.00000000  | 0.00000000  | 0.00000000  | C | -1.01287286 | 9.56615474  | -0.15554476  |
| Cl | 2.40720024  | 0.00000000  | 0.00000000  | C | -2.07737291 | 8.88563211  | -1.01375615  |
| N  | 0.12814591  | 2.08251642  | 0.00000000  | C | -3.47291970 | 9.40300576  | -0.63909619  |
| C  | 0.25123318  | 2.81096326  | 1.11807921  | C | -3.79434100 | 9.18701793  | 0.84809092   |
| C  | 0.33188924  | 4.18618852  | 1.11151055  | C | -5.21674916 | 9.67553500  | 1.21458532   |
| C  | 0.29995223  | 4.86053942  | -0.12111873 | C | -6.27722625 | 8.96754725  | 0.35857974   |
| C  | 0.20451359  | 4.09631802  | -1.28156364 | C | -7.69394551 | 9.13520345  | 0.90352487   |
| C  | 0.12428959  | 2.70593491  | -1.20682636 | C | -7.78555498 | 8.67458779  | 2.34483235   |
| C  | 0.04679049  | 1.79641601  | -2.33554446 | C | -6.61954393 | 8.99257435  | 3.18071682   |
| C  | 0.04313062  | 0.42476316  | -1.99196484 | C | -5.47865468 | 9.50912089  | 2.69755553   |
| C  | 0.03770172  | -0.49475603 | -3.04541279 | C | -4.39471119 | 9.98196462  | 3.62342924   |
| C  | -0.00602236 | -0.07772315 | -4.37179578 | C | -3.01041670 | 9.46781648  | 3.21954369   |
| C  | -0.03320951 | 1.28171008  | -4.69005344 | C | -2.71736641 | 9.80599803  | 1.76019649   |
| C  | 0.00403978  | 2.21762648  | -3.67004786 | C | -1.34893310 | 9.29991712  | 1.32995484   |
| H  | 0.29095075  | 2.24789632  | 2.03953616  | C | -0.10711253 | 9.78277380  | 2.08898858   |
| H  | 0.42537303  | 4.73223595  | 2.03908046  | C | 1.06803347  | 9.46559203  | 1.12901685   |
| H  | 0.19767256  | 4.58225749  | -2.24567860 | O | 1.12799208  | 9.40854181  | -1.36317919  |
| H  | 0.08639875  | -1.55506218 | -2.83154834 | H | 1.97603336  | 8.95153816  | -1.40265485  |
| H  | -0.01340659 | -0.81567095 | -5.16605030 | C | -0.93154486 | 11.08981339 | -0.45724460  |
| H  | -0.06822152 | 1.60137839  | -5.72367760 | H | -1.74197480 | 11.59080774 | 0.07420302   |
| H  | 0.00259614  | 3.27343682  | -3.91333954 | H | -0.00664390 | 11.48746043 | -0.03945047  |
| C  | -2.04097088 | -0.77867382 | -0.09793576 | C | -1.01722115 | 11.49023079 | -1.93237761  |
| C  | -1.87778244 | -0.01818497 | 1.08578610  | H | -0.87430602 | 12.56995099 | -2.02779758  |
| C  | -0.93423983 | -0.38563186 | 2.10208805  | H | -0.25463788 | 10.98713998 | -2.52440631  |
| C  | -0.02596469 | -1.41297647 | 1.87941026  | H | -1.99583592 | 11.24781376 | -2.35176739  |
| C  | -0.10476905 | -2.12169661 | 0.62769041  | H | -2.04231626 | 7.80779563  | -0.83313525  |
| C  | -1.12428096 | -1.85749054 | -0.29785253 | H | -1.88585770 | 9.04171630  | -2.07630861  |
| H  | -2.48924765 | 0.85957268  | 1.23701467  | H | -3.55196106 | 10.47142267 | -0.86767687  |
| H  | -0.85862814 | 0.20883153  | 3.00275648  | H | -4.21293141 | 8.89223740  | -1.925587173 |
| H  | 0.65617271  | -2.85160704 | 0.39223414  | H | -3.77445831 | 8.10369063  | 1.03442989   |
| H  | -1.15646103 | -2.40346463 | -1.22995827 | H | -5.24937604 | 10.75538692 | 1.00171330   |
| C  | -3.08416313 | -0.47635867 | -1.14328768 | H | -6.03199317 | 7.89989300  | 0.32783237   |
| H  | -2.64559188 | -0.75843048 | -2.10434596 | H | -6.23020405 | 9.33438254  | -0.66716745  |
| C  | -3.44750709 | 1.00559940  | -1.21765391 | H | -7.97508579 | 10.19578455 | 0.88672137   |
| H  | -4.12072459 | 1.17837093  | -2.05971744 | H | -8.42846174 | 8.58838465  | 0.31107094   |
| H  | -3.96259543 | 1.33241592  | -0.31002132 | O | -8.77680203 | 8.13215113  | 2.79601217   |
| H  | -2.55275089 | 1.61429509  | -1.35545793 | H | -6.74728823 | 8.84218289  | 4.24791707   |
| C  | -4.32976051 | -1.34064606 | -0.90378818 | H | -4.37203300 | 11.07944077 | 3.57542165   |
| H  | -5.06474291 | -1.17700008 | -1.69619475 | H | -4.63734642 | 9.70970349  | 4.65281503   |
| H  | -4.07544965 | -2.40325470 | -0.88268900 | H | -2.96649299 | 8.38001534  | 3.34958453   |
| H  | -4.79274942 | -1.08138825 | 0.05261193  | H | -2.24942612 | 9.90413126  | 3.87063859   |
| C  | 1.09651743  | -1.70879326 | 2.82077013  | H | -2.76041221 | 10.89709867 | 1.65779342   |
| H  | 1.07918805  | -2.75942750 | 3.12439861  | H | -1.39148078 | 8.20873683  | 1.43887716   |
| H  | 2.04619017  | -1.51131979 | 2.31389227  | H | -0.17264593 | 10.85792157 | 2.27203739   |
| H  | 1.03799878  | -1.08310309 | 3.71279482  | H | 0.00238477  | 9.29056062  | 3.05559843   |
| C  | 0.36295078  | 6.28020000  | -0.17401922 | H | 1.75517637  | 8.72591443  | 1.54026964   |
| C  | 0.38655788  | 7.48488821  | -0.20397583 | H | 1.64225178  | 10.36068822 | 0.88933677   |
| C  | 0.42558225  | 8.95157807  | -0.20522074 |   |             |             |              |

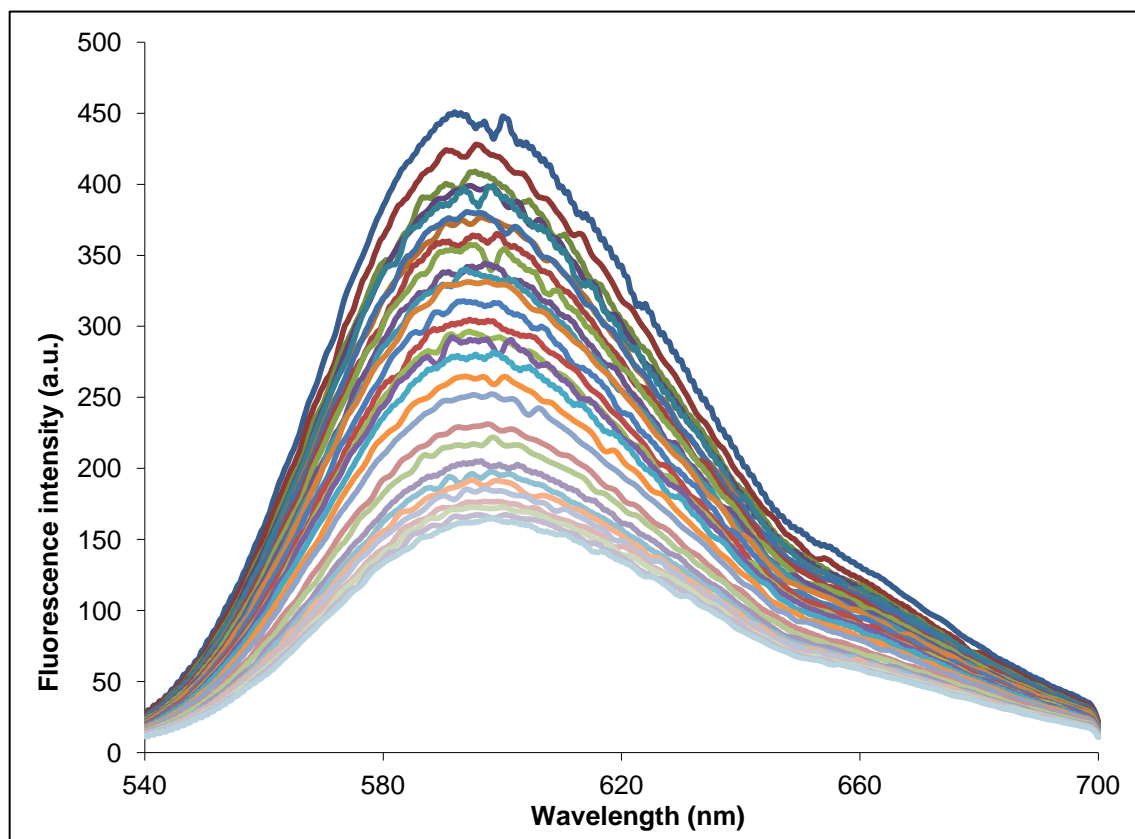

**Figure S1.** Fluorescence quenching of EB bound ct-DNA with **1** (0 – 70  $\mu$ M in 2.5  $\mu$ M increments)

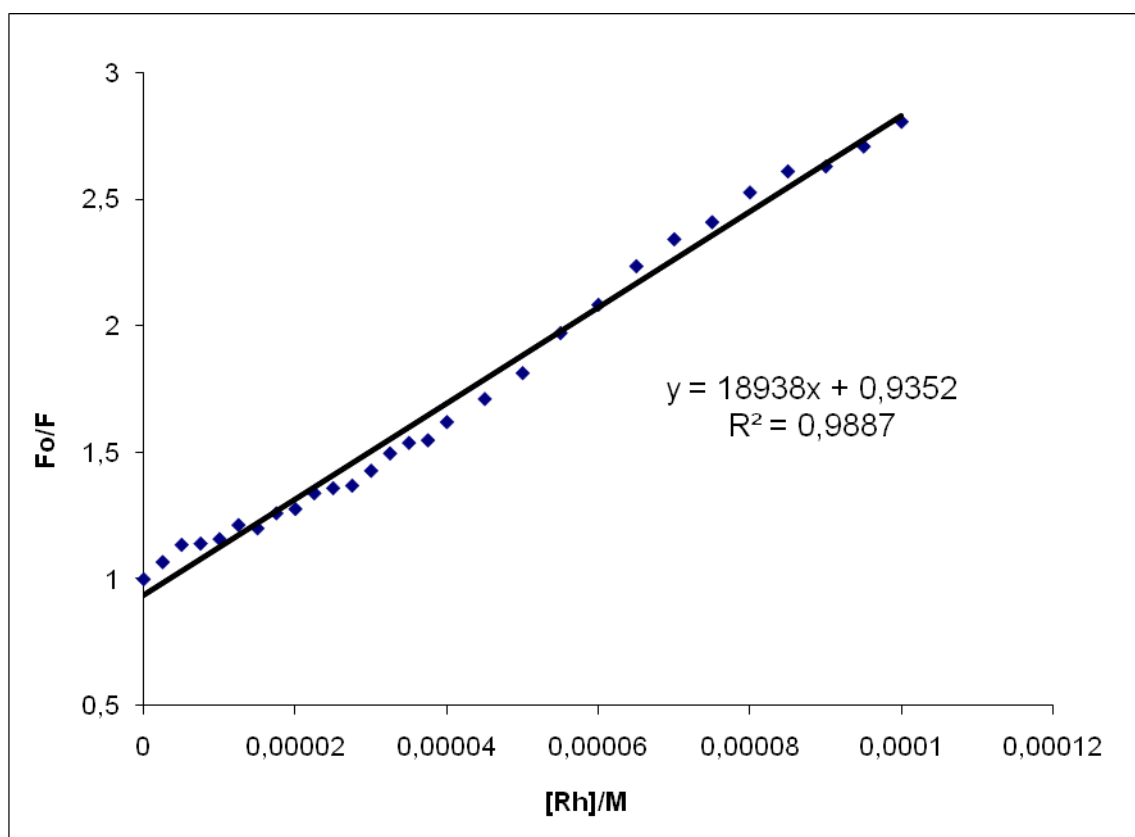

**Figure S2.** Stern-Volmer plot of the titration of BE bound ct-DNA with **1**



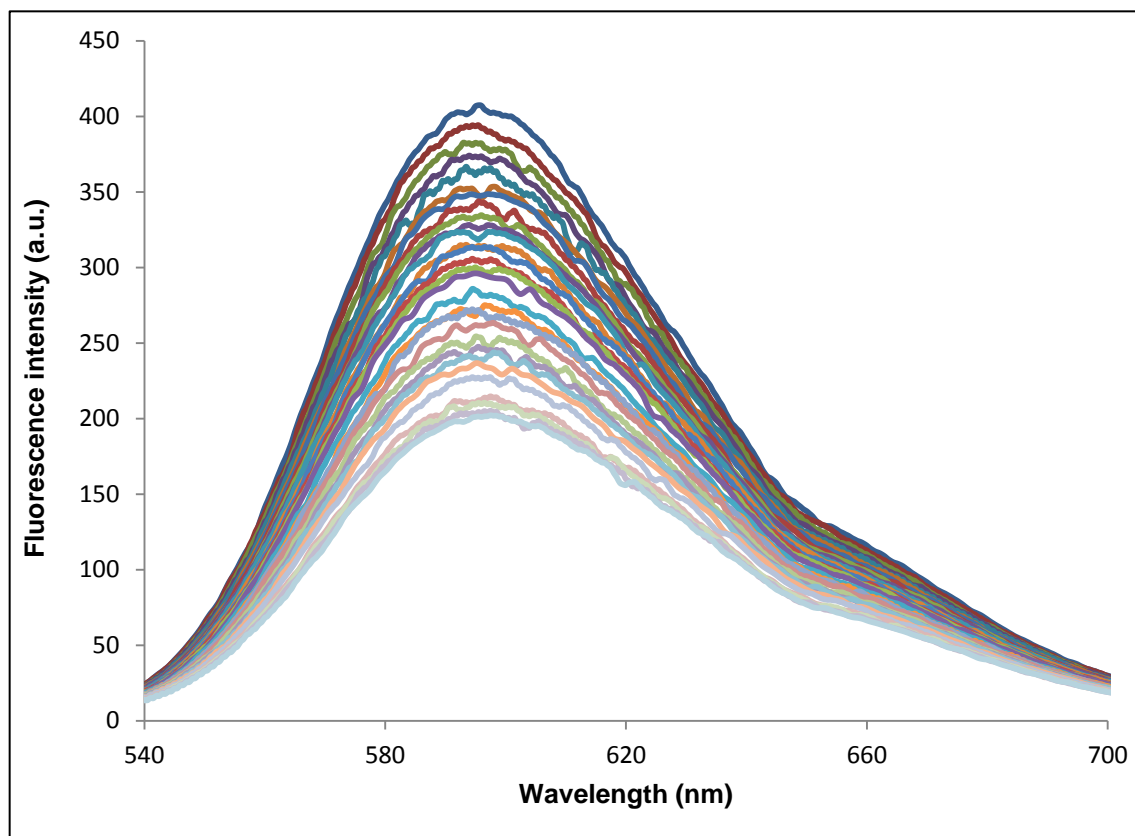

**Figure S3.** Fluorescence quenching of EB bound ct-DNA with **2** (0 – 70  $\mu\text{M}$  in 2.5  $\mu\text{M}$  increments)

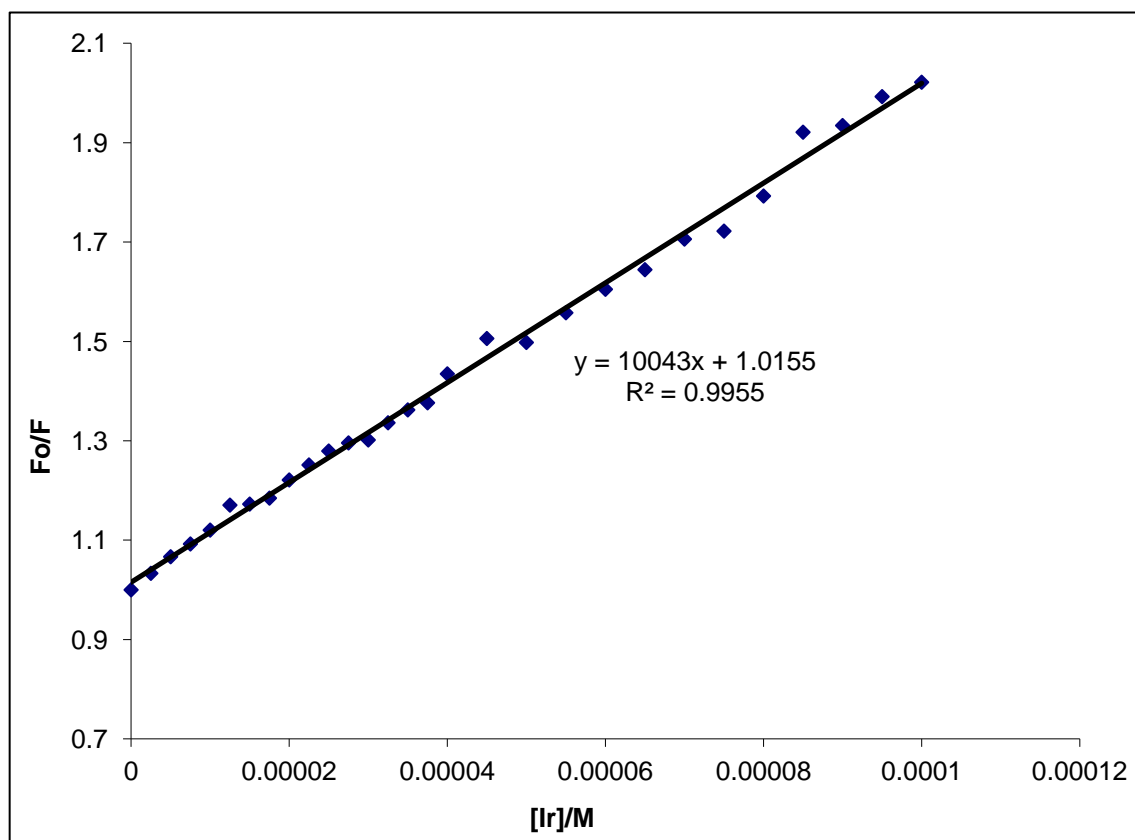

**Figure S4.** Stern-Volmer plot of the titration of BE bound ct-DNA with **2**



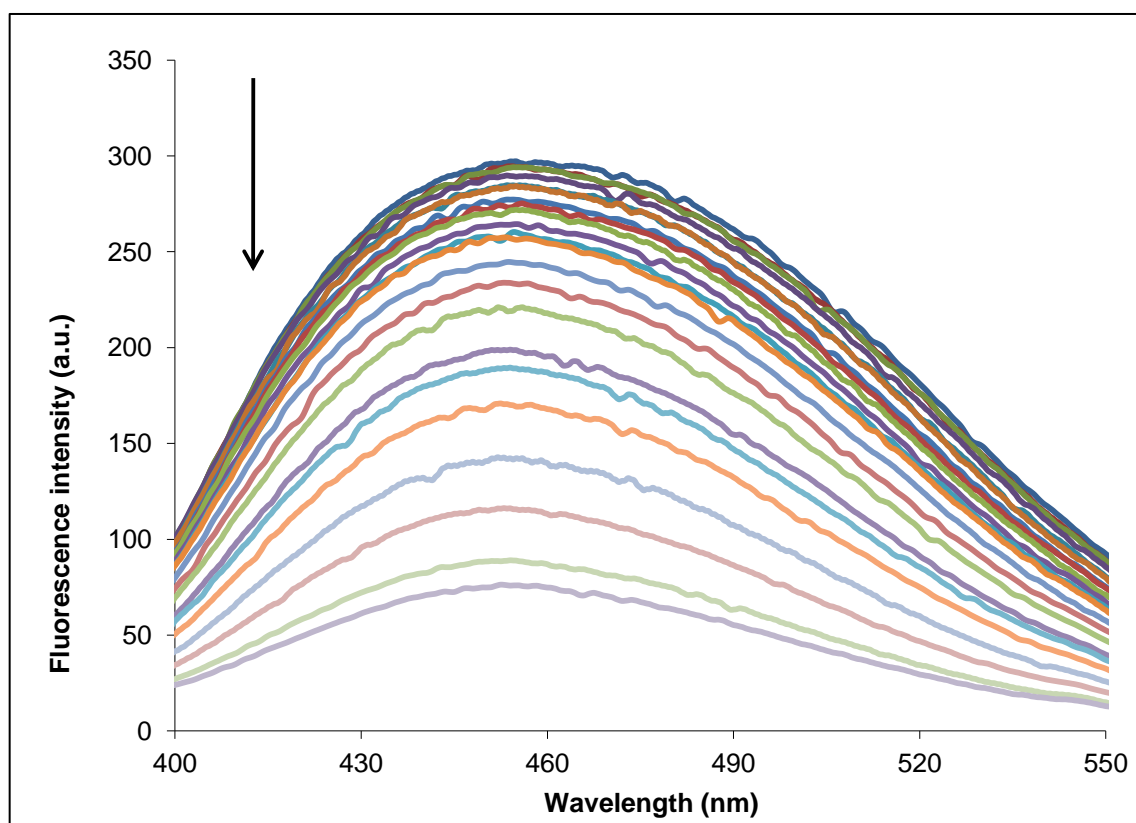

**Figure S5.** Fluorescence quenching of Hoechst 33258-DNA with **1** (0 – 55  $\mu\text{M}$  in 2.5  $\mu\text{M}$  increments)

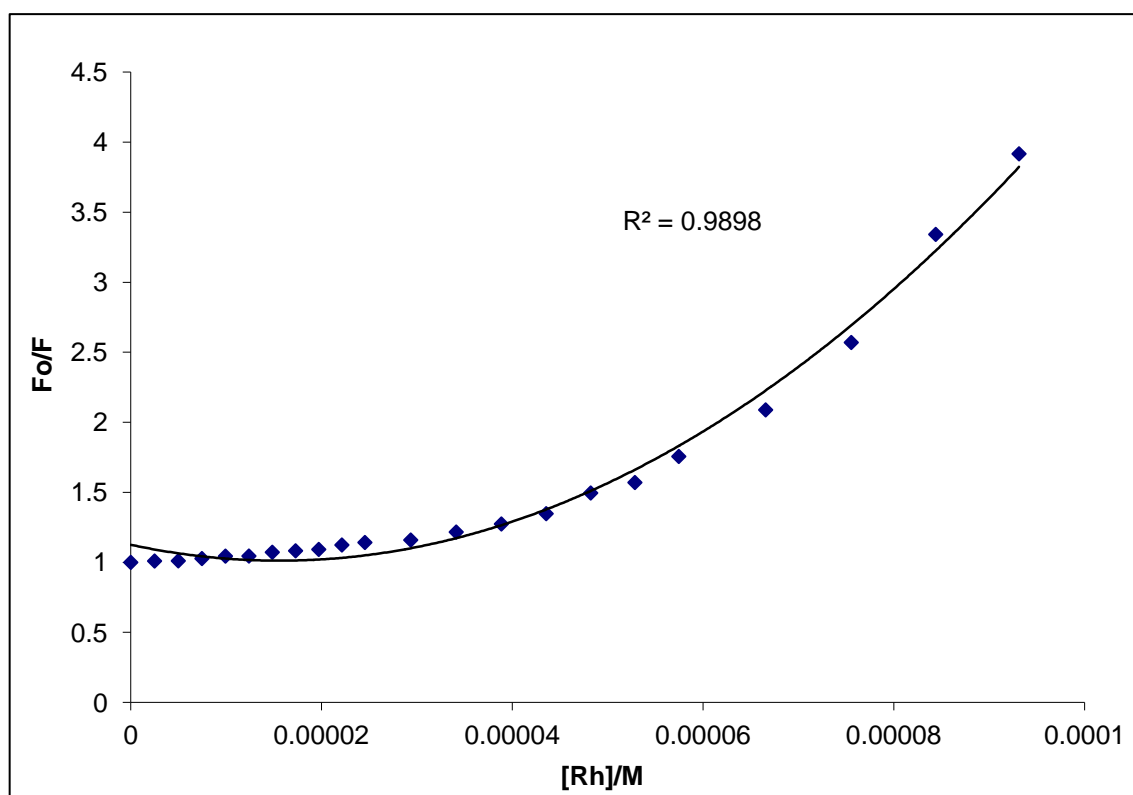

**Figure S6.** Stern-Volmer plot of the titration of Hoechst 33258-DNA with **1**

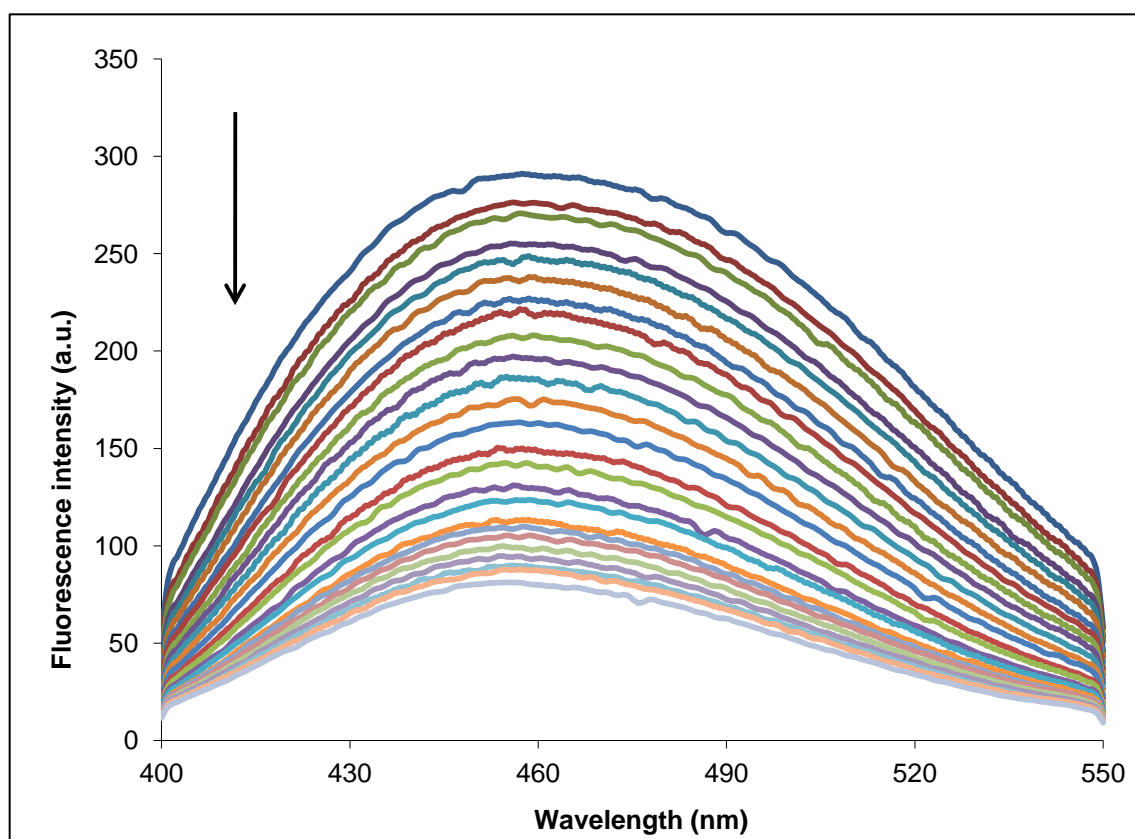

**Figure S7.** Fluorescence quenching of Hoechst 33258-DNA with **2** (0 – 62.5  $\mu\text{M}$  in 2.5  $\mu\text{M}$  increments)

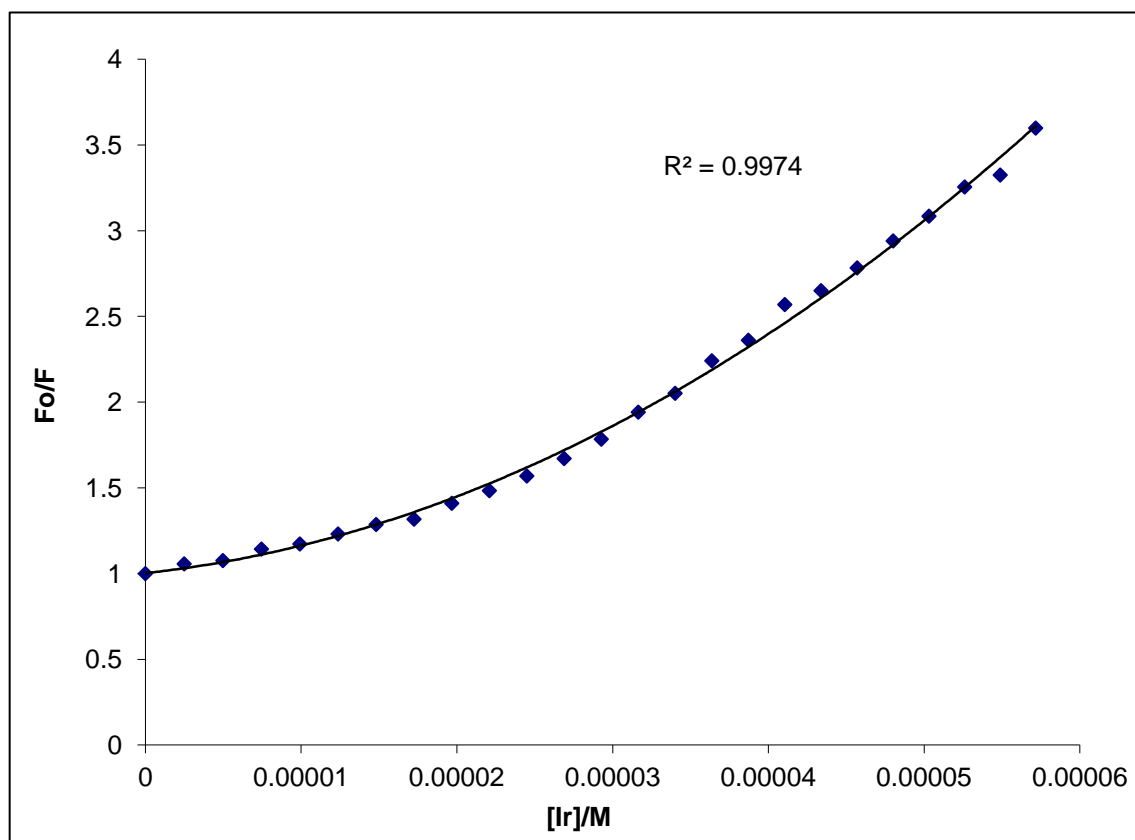

**Figure S8.** Stern-Volmer plot of the titration of Hoechst 33258-DNA with **2**

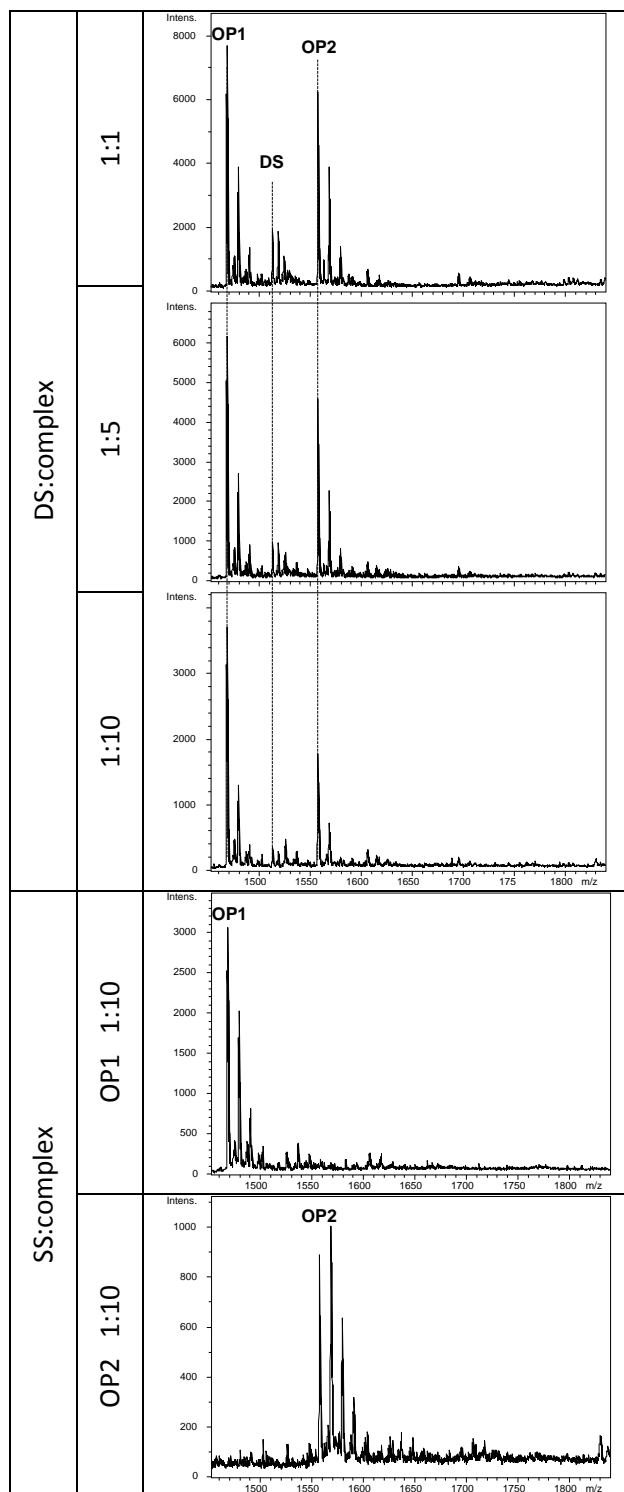

**Figure S9.** Negative ESI-TOF MS spectra obtained after the mixture of the Ir complex **2** with the corresponding solution containing the oligonucleotides assayed after incubation during 24 h. At the m/z range shown, the peaks related with the single oligonucleotides (OP1 and OP2) exhibit the -2 charge, while those related with the DS are -4 charged.
